# Supplementary material for: Mass Spectrometry Imaging for Reliable and Fast Classification of Non-Small Cell Lung Cancer Subtypes
Source: PubMed Central journal article supplement (PMC7564257; doi:10.3390/cancers12092704), 2020-09-21
Supplement: cancers-12-02704-s001.pdf [file cancers-12-02704-s001.pdf]

Article

# Mass Spectrometry Imaging for Reliable and Fast Classification of Non-small Cell Lung Cancer subtypes

Mark Kriegsmann, Christiane Zgorzelski, Rita Casadonte, Kristina Schwamborn, Thomas Muley, Hauke Winter, Martin Eichhorn, Florian Eichhorn, Arne Warth, Soeren-Oliver Deininger, Petros Christopoulos, Michael Thomas, Thomas Longerich, Albrecht Stenzinger, Wilko Weichert, Carsten Müller-Tidow, Jörg Kriegsmann, Peter Schirmacher and Katharina Kriegsmann

## Supplementary Materials

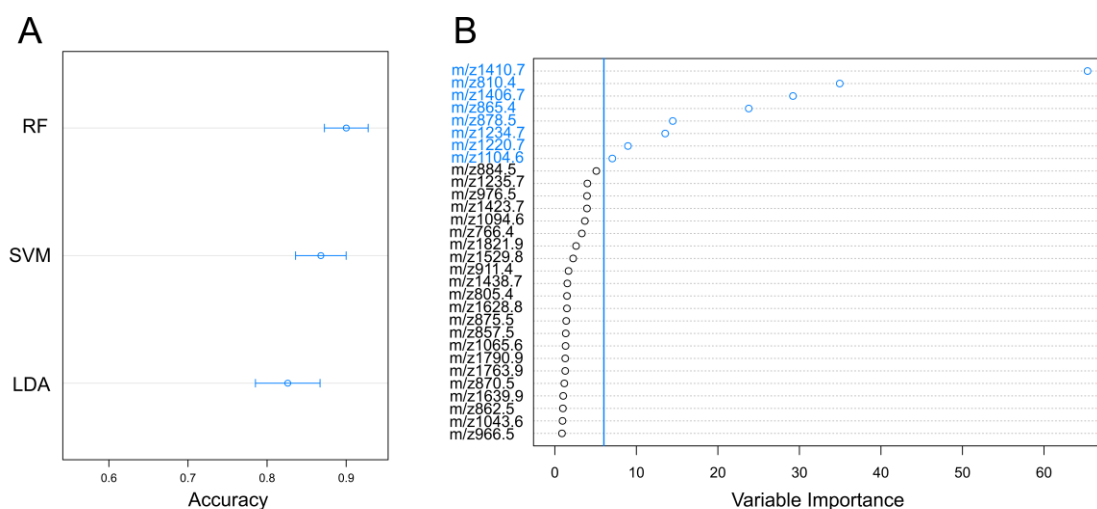

**Figure S1.** Classification accuracy and variable importance of different algorithms. Among the evaluated classification algorithms—RF (random forest), SVM (support vector machine) and LDA (linear discriminant analysis)—RF showed the highest level of accuracy in discriminating between ADC and SqCC samples (A). *m/z* peaks were ranked by variable importance to contribute to the RF classification algorithm. The 8 most important *m/z* peaks were selected for further evaluation (B).

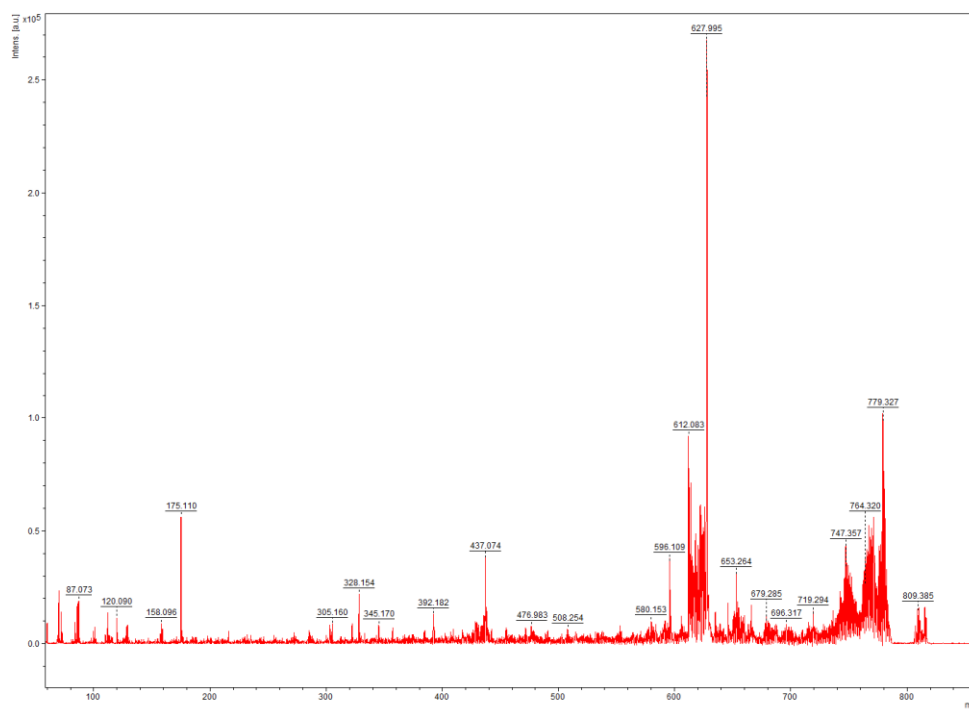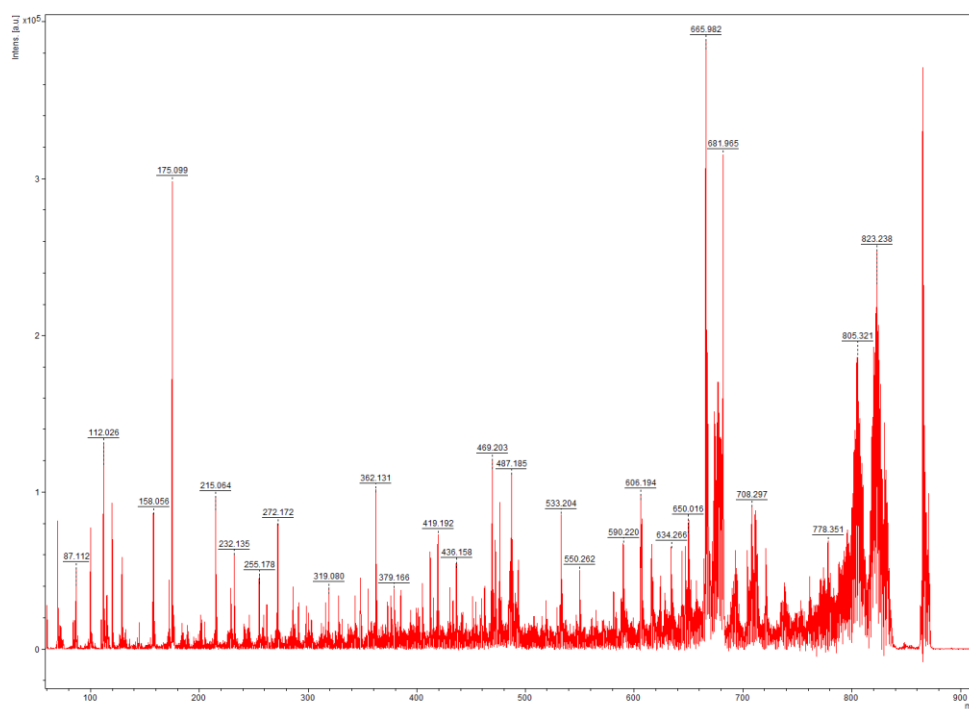

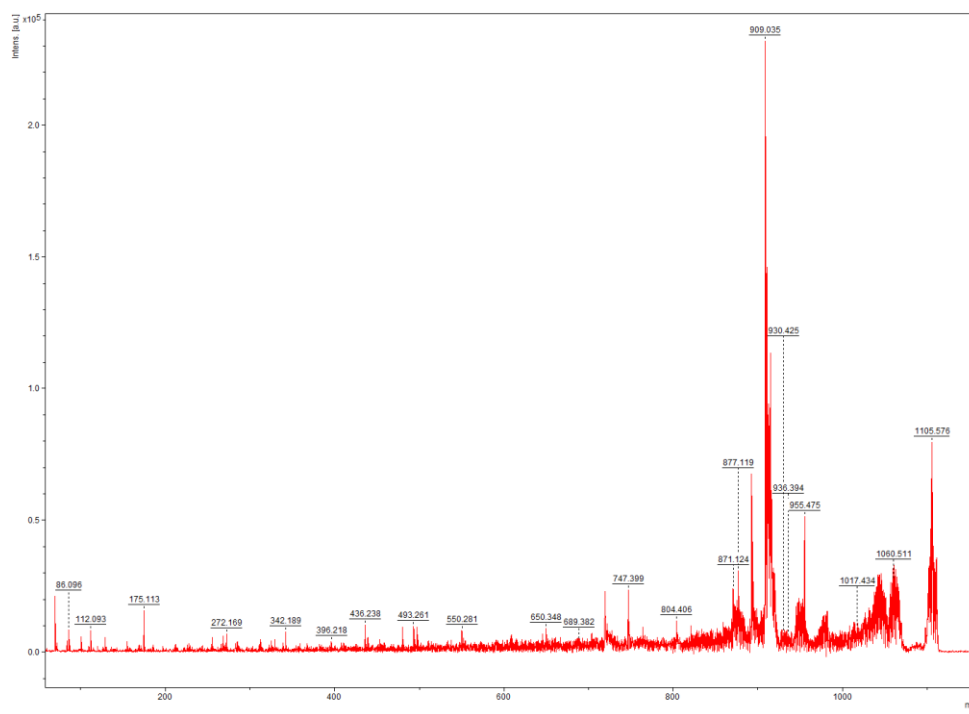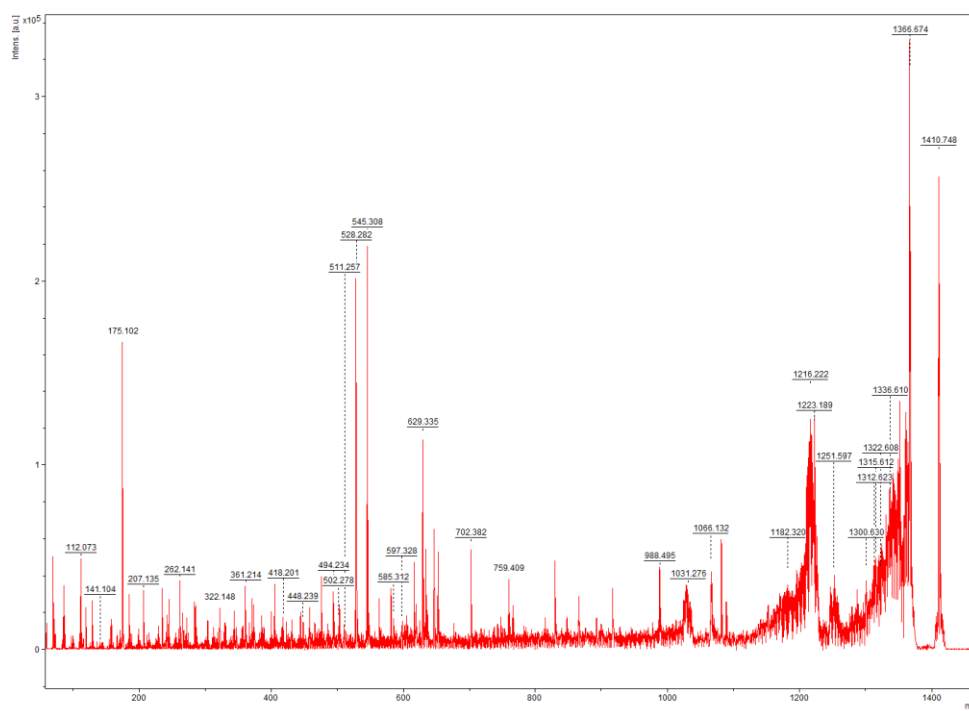

Figure S2. Spectra from Identifications.

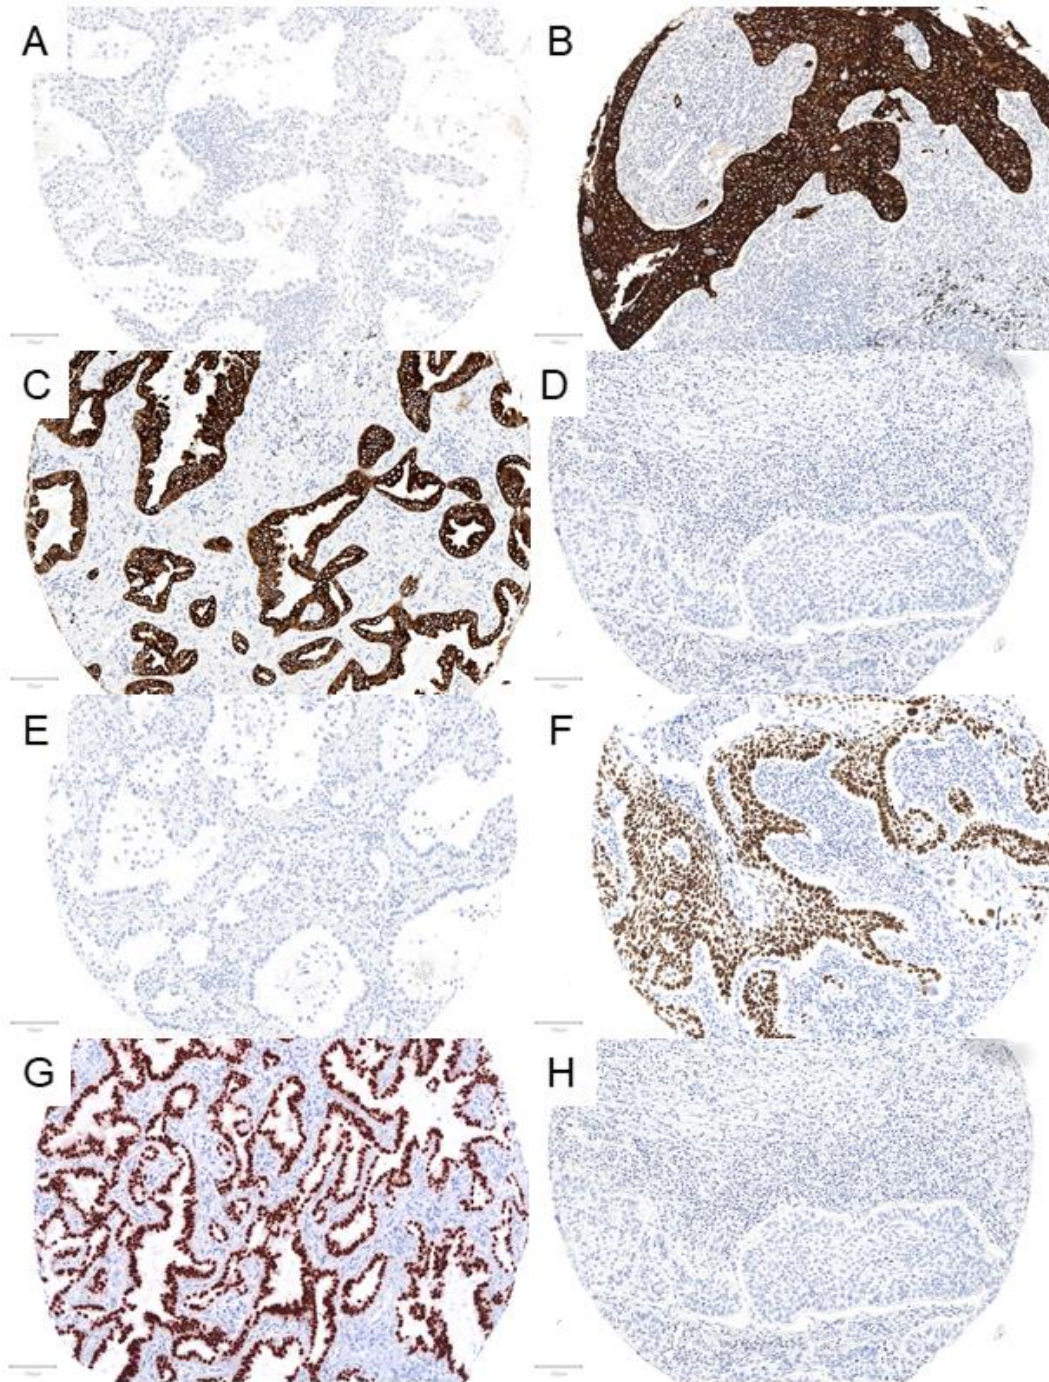

**Figure S3.** Typical examples of the immunohistological staining characteristics of adenocarcinoma and squamous cell carcinoma. Immunohistological staining of adenocarcinoma (left column) and squamous cell carcinoma (right column) are displayed. Adenocarcinomas are frequently positive for CK7 (C) and TTF-1 (G) and are negative for CK5/6 (A) and p40 (E). Squamous cell carcinoma is often positive for CK5/6 (B) and p40 (F) and is frequently negative for CK7 (D) and TTF-1 (H).

**Table S1.** MS/MS identification results.

| Observed<br><i>m/z</i>              | Mr<br>(expt)<br><i>m/z</i> | Mr<br>(calc)<br><i>m/z</i> | Mass<br>Error<br>(ppm) | Mascot<br>Score | Peptide<br>Sequence                       | Protein Name                 | Variable Modifications                                                         |
|-------------------------------------|----------------------------|----------------------------|------------------------|-----------------|-------------------------------------------|------------------------------|--------------------------------------------------------------------------------|
| <b>Identified in this study</b>     |                            |                            |                        |                 |                                           |                              |                                                                                |
| 810.4                               | 809.3                      | 809.4                      | -6.7                   | 64              | R.QSSVSFR.S                               | Keratin 5, type II           | Acetyl (Protein N-term),<br>Oxidation (M)                                      |
| 865.3                               | 864.3                      | 864.3                      | 9.1                    | 47              | R.SGGGGGG<br>GFGR.V                       | Keratin 5, type II           | Acetyl (Protein N-term),<br>Oxidation (M)                                      |
| 1104.5                              | 1103.5                     | 1103.5                     | -10.5                  | 69              | R.SAYGGPV<br>GAGIRE                       | Keratin 7, type II           | Acetyl (Protein N-term),<br>Oxidation (HW),<br>Oxidation (M),<br>Oxidation (P) |
| 1410.7                              | 1409.7                     | 1409.7                     | 26.7                   | 42              | R.SFSTASAIT<br>PSVSR.T                    | Keratin 5, type II           | Acetyl (Protein N-term),<br>Oxidation (M)                                      |
| <b>Identified in the literature</b> |                            |                            |                        |                 |                                           |                              |                                                                                |
| 1220.6                              |                            |                            |                        |                 |                                           |                              |                                                                                |
| 1222.6 [10]                         | 1221.6                     | 1221.6                     | -2.95                  | 55              | R.TKFETEQA<br>LR.M                        | Keratin 19, type I           |                                                                                |
| 1222.6 [10]                         | 1221.6                     | 1221.6                     | -20.45                 | 40              | R.LEQEIATY<br>R.R                         | Keratin 17, type I           |                                                                                |
| 1234.6                              |                            |                            |                        |                 |                                           |                              |                                                                                |
| 1235.6 <sup>f</sup>                 |                            |                            | -11.37                 | 36              | TGHPGTVGP<br>AGIR                         | Collagen alpha-2(I)<br>chain |                                                                                |
| 1406.7                              |                            |                            |                        |                 |                                           |                              |                                                                                |
| 1407.7 [11]                         | 1406.7                     | 1406.7                     | -1.01                  | 34              | K.ADTLTDEI<br>NFLR.A<br>M.SIHFSSPVF       | Keratin 6A, type II          |                                                                                |
| 1406.7 [11]                         | 1405.7                     | 1405.7                     | 2.63                   | 61              | TSR.S +<br>Acetyl<br>(Protein N-<br>term) | Keratin 7, type II           |                                                                                |
| <b>Not identified</b>               |                            |                            |                        |                 |                                           |                              |                                                                                |
| 878.4                               |                            |                            |                        |                 |                                           |                              |                                                                                |

**Table S2.** Antibodies and staining conditions.

| Antibody | Company    | Clone    | Pretreatment            | Buffer Incubation<br>Time (min) | Antibody Incubation<br>Time (min) | Dilution |
|----------|------------|----------|-------------------------|---------------------------------|-----------------------------------|----------|
| CK5/6    | Ventana    | D5/16 B4 | Tris/Borat/EDTA, pH 8.4 | 56                              | 24                                | RTU      |
| p40      | Ventana    | BC28     | Tris/Borat/EDTA, pH 8.4 | 48                              | 24                                | RTU      |
| CK7      | Ventana    | SP52     | Tris/Borat/EDTA, pH 8.4 | 32                              | 24                                | RTU      |
| Napsin-A | Novocastra | IP64     | Tris/Borat/EDTA, pH 8.4 | 32                              | 24                                | 1:400    |
| TTF-1    | Novocastra | SPT24    | Tris/Borat/EDTA, pH 8.4 | 56                              | 24                                | 1:100    |

CK, cytokeratin; RTU, ready to use; TTF-1, thyroid transcription factor-1.
